# Supplementary material for: Co,N-doped GQDs/SnO2 mesoporous microspheres exhibit synergistically enhanced gas sensing properties for H2S gas detection
Source: Royal Society of Chemistry journal article supplement (doi:10.1039/d2ta00837h), 2022-01-01
Supplement: d2ta00837h1.pdf [file d2ta00837h1.pdf]

# **Co,N-doped GQDs/SnO<sub>2</sub> mesoporous microspheres exhibit synergistically enhanced gas sensing properties for H<sub>2</sub>S gas detection**

Tingting Chen<sup>1,2</sup>, Jianhai Sun<sup>1\*</sup>, Ning Xue<sup>1</sup>, Xinxiao Zhang<sup>1,2</sup>, Hai-  
rong Wang<sup>3</sup>, Kaisheng Jiang<sup>1,2</sup>, Tianye Zhou<sup>1,2</sup>, Hao Quan<sup>1,2</sup>

<sup>1</sup>State Key Laboratory of Transducer Technology, Aerospace Information Research  
Institute, Chinese Academy of Sciences, Beijing, 100194, China

<sup>2</sup>University of Chinese Academy of Sciences, Beijing, 100049, China

<sup>3</sup>School of Mechanical Engineering, Xi'an Jiaotong University, Xi'an, Shaanxi 710049,  
China

---

\* Corresponding Author: Jianhai Sun, Professor, State Key Laboratory of Transducer Technology, Aerospace  
Information Research Institute, Chinese Academy of Sciences  
Tel: 86-10-58887183, FAX: 86-10-58887183, email: sunjh@aircas.ac.cn

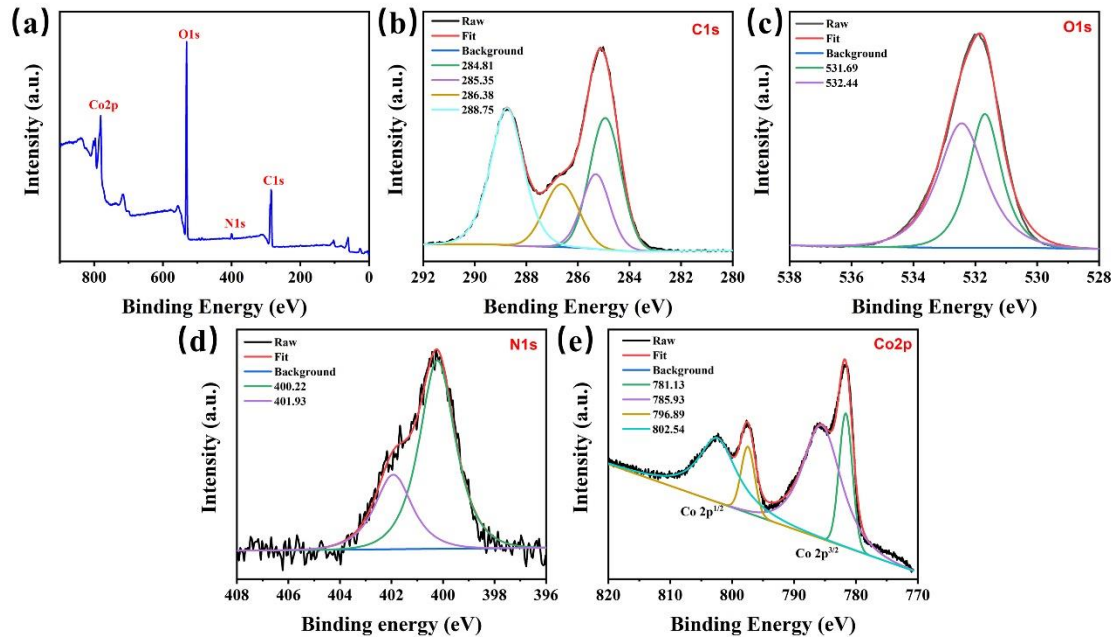

**Figure S1** X-ray photoelectron spectroscopy (XPS) survey spectrum (a) and high resolution XPS spectrum of Co,N-GQDs: (b) C<sub>1s</sub>, (c) O<sub>1s</sub>; (d) N<sub>1s</sub>; (e) Co<sub>2p</sub>.

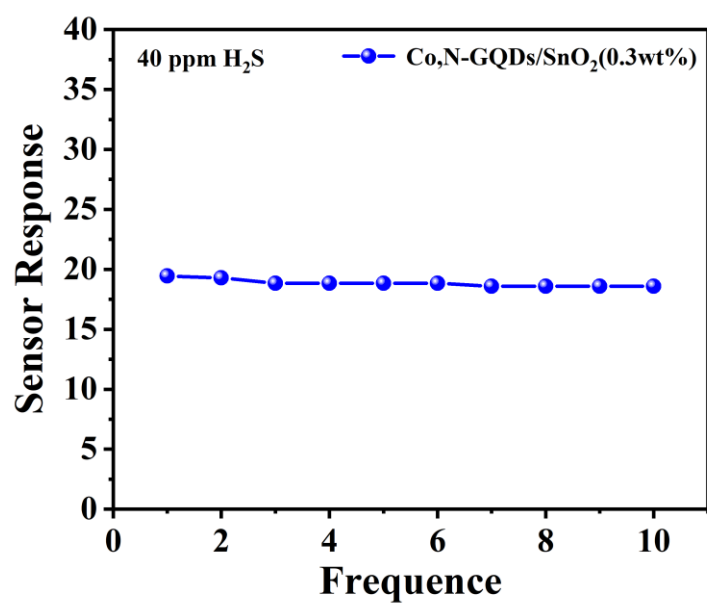

**Figure S2** Sensing properties of 0.3 % Co,N-GQDs/SnO<sub>2</sub> mesoporous microspheres under repeated exposure to 40 ppm H<sub>2</sub>S. The deviation of ten repeated test results is 0.299.
